# Supplementary material for: Adsorption of Cadmium and Lead Capacity and Environmental Stability of Magnesium-Modified High-Sulfur Hydrochar: Greenly Utilizing Chicken Feather
Source: MDPI journal article supplement (doi:10.3390/toxics12050356), 2024-05-11
Supplement: s1 [file s1]

---

## Supplementary Material

# Adsorption of Cadmium and Lead Capacity and Environmental Stability of Magnesium-Modified High-Sulfur Hydrochar: Greenly Utilizing Chicken Feather

Weiqi Deng <sup>1,2,3</sup>, Xubin Kuang <sup>1,2</sup>, Zhaoxin Xu <sup>1,2</sup>, Deyun Li <sup>4</sup>, Yongtao Li <sup>1,2</sup> and Yulong Zhang <sup>1,2,3,\*</sup>

<sup>1</sup> Key Laboratory of Arable Land Conservation (South China), Ministry of Agriculture, College of Natural Resources and Environment, South China Agricultural University, Guangzhou, 510642, China; deng79141@163.com (W.D.); 15918625625@163.com (X.K.); xuzhaoxin0643@163.com (Z.X.); yongtao@scau.edu.cn (Y.L.); yulongzhang@scau.edu.cn (Y.Z.)

<sup>2</sup> College of Natural Resources and Environment, Joint Institute for Environmental Research & Education, South China Agricultural University, Guangzhou 510642, China

<sup>3</sup> WENS Foodstuff Grp Co Ltd, Yunfu 527400, China

<sup>4</sup> School of Environmental Science and Engineering, Shaanxi University of Science & Technology, Xi'an 710021, China; deyun\_94@163.com (D.L.)

\* Correspondence: yulongzhang@scau.edu.cn

Table S1. The element content of chicken feathers (%)

| Elemental context | C     | H    | N     | S    |
|-------------------|-------|------|-------|------|
| Chicken feather   | 39.88 | 6.04 | 12.07 | 4.02 |

Table S2. Nutrient content and basic physicochemical properties of soil tested

| Index                        | Unit                  | Context        |
|------------------------------|-----------------------|----------------|
| pH                           | /                     | 6.34 ± 0.15    |
| Total nitrogen               |                       | 1.69 ± 0.01    |
| Total phosphorus             |                       | 0.66 ± 0.10    |
| Total potassium              | g·kg <sup>-1</sup>    | 20.61 ± 0.05   |
| Soil organic matter          |                       | 33.34 ± 0.04   |
| Alkali-hydrolyzable nitrogen |                       | 153.00 ± 1.04  |
| Available phosphorus         | mg·kg <sup>-1</sup>   | 13.23 ± 0.17   |
| Readily available potassium  |                       | 68.60 ± 0.26   |
| Cation exchange capacity     |                       | 14.20 ± 0.06   |
| Exchangeable calcium         |                       | 2483.04 ± 1.96 |
| Exchangeable magnesium       | cmol·kg <sup>-1</sup> | 324.395 ± 2.04 |

Table S3. Fertilizer application method for the bok choy potting test

|                       | Base fertilizer          | First topdressing       | Second topdressing       | Third topdressing        |
|-----------------------|--------------------------|-------------------------|--------------------------|--------------------------|
| Fertilizer proportion | 40%                      | 15%                     | 30%                      | 15%                      |
| Fertilizer time       | Before transplanting 7 d | After transplanting 7 d | After transplanting 14 d | After transplanting 21 d |

Table S4. Sulfur content of biochar and hydrochar in different studies

| Sulfur content (%) | Pyrolysis process          | Reaction temperature (°C) | Raw material    | Reference |
|--------------------|----------------------------|---------------------------|-----------------|-----------|
| 0.88               | Slow pyrolysis             | 450                       | Chicken feather | [22]      |
| 0.96               | Slow pyrolysis             | 450                       | Chicken feather | [22]      |
| 0.32               | Slow pyrolysis             | 450                       | Chicken feather | [23]      |
| ~0.37              | Slow pyrolysis             | 400                       | Sewage          | [68]      |
| 0.02               | Slow pyrolysis             | 450                       | Corn straw      | [69]      |
| 1.88               | Hydrothermal carbonization | 150                       | Chicken feather | [26]      |
| 0.38               | Hydrothermal carbonization | 200                       | Rice Straw      | [40]      |
| 0.31               | Hydrothermal carbonization | 200                       | Swine Manure    | [40]      |
| 3.336              | Hydrothermal carbonization | 180                       | Chicken feather | This work |
| 3.683              | Hydrothermal carbonization | 180                       | Chicken feather | This work |

Table S5. Carbon stability and carbon loss rate of hydrochar determined by H<sub>2</sub>O<sub>2</sub> oxidation (%)

|                  | WF           | MWF          |
|------------------|--------------|--------------|
| Carbon stability | 58.16 ± 0.8a | 59.42 ± 0.3a |
| Carbon loss rate | 41.84 ± 0.8a | 40.58 ± 0.3a |

Different lowercase letters indicate significant differences between processes ( $p < 0.05$ ).

Table S6. Properties and nutrient composition of different organic water-soluble fertilizers

|                                     | WF            | MWF           | WFNPK         | MWFNPK        |
|-------------------------------------|---------------|---------------|---------------|---------------|
| pH (1: 200)                         | 8.219 ± 0.074 | 7.422 ± 0.065 | 6.360 ± 0.091 | 5.627 ± 0.038 |
| Organic matter (g·L <sup>-1</sup> ) | 49.68 ± 0.04  | 53.84 ± 0.61  | 49.68 ± 0.04  | 53.84 ± 0.61  |
| TN (g·L <sup>-1</sup> )             | 9.84 ± 0.42   | 7.37 ± 0.21   | 82.48         | 82.48         |
| TP (g·L <sup>-1</sup> )             | 0.04 ± 0.00   | 0.12 ± 0.00   | 13.57         | 13.57         |
| TK (g·L <sup>-1</sup> )             | 0.02 ± 0.00   | 0.02 ± 0.00   | 44.22         | 44.22         |
| Mg (g·L <sup>-1</sup> )             | 0.01 ± 0.00   | 22.69 ± 0.07  | 0.01 ± 0.00   | 22.69 ± 0.07  |

Table S7 Effects of different fertilization treatments on yield indexes of bok choy

| Treatment               | CK            | NPK            | WF             | WFNPK          | MWFNPK        |
|-------------------------|---------------|----------------|----------------|----------------|---------------|
| Ground fresh weight (g) | 27.71 ± 1.75a | 33.39 ± 2.36b  | 32.29 ± 2.85ab | 35.33 ± 2.07bc | 39.04 ± 2.86c |
| Ground dry weight (g)   | 1.45 ± 0.20a  | 1.63 ± 0.22ab  | 1.71 ± 0.28ab  | 1.77 ± 0.21ab  | 2.09 ± 0.10b  |
| Leaf length (cm)        | 19.88 ± 2.78a | 20.91 ± 2.24ab | 20.21 ± 1.48ab | 21.79 ± 2.33bc | 22.70 ± 1.21c |
| Leaf width (cm)         | 8.18 ± 1.01a  | 8.76 ± 1.06ab  | 8.70 ± 0.94ab  | 8.46 ± 1.11ab  | 9.27 ± 1.32b  |
| Leaf number             | 6.11 ± 0.57a  | 6.44 ± 0.68ab  | 6.89 ± 0.57bc  | 7.00 ± 0.94c   | 6.78 ± 0.79bc |
| Plant height (cm)       | 21.2 ± 3.04a  | 21.90 ± 2.41a  | 21.51 ± 1.38a  | 22.60 ± 2.24ab | 23.60 ± 1.45b |
| Root length (cm)        | 6.40 ± 0.36a  | 6.58 ± 1.38a   | 7.00 ± 0.80a   | 7.37 ± 0.45a   | 7.33 ± 1.86a  |

Different lowercase letters indicate significant differences between processes ( $p < 0.05$ )

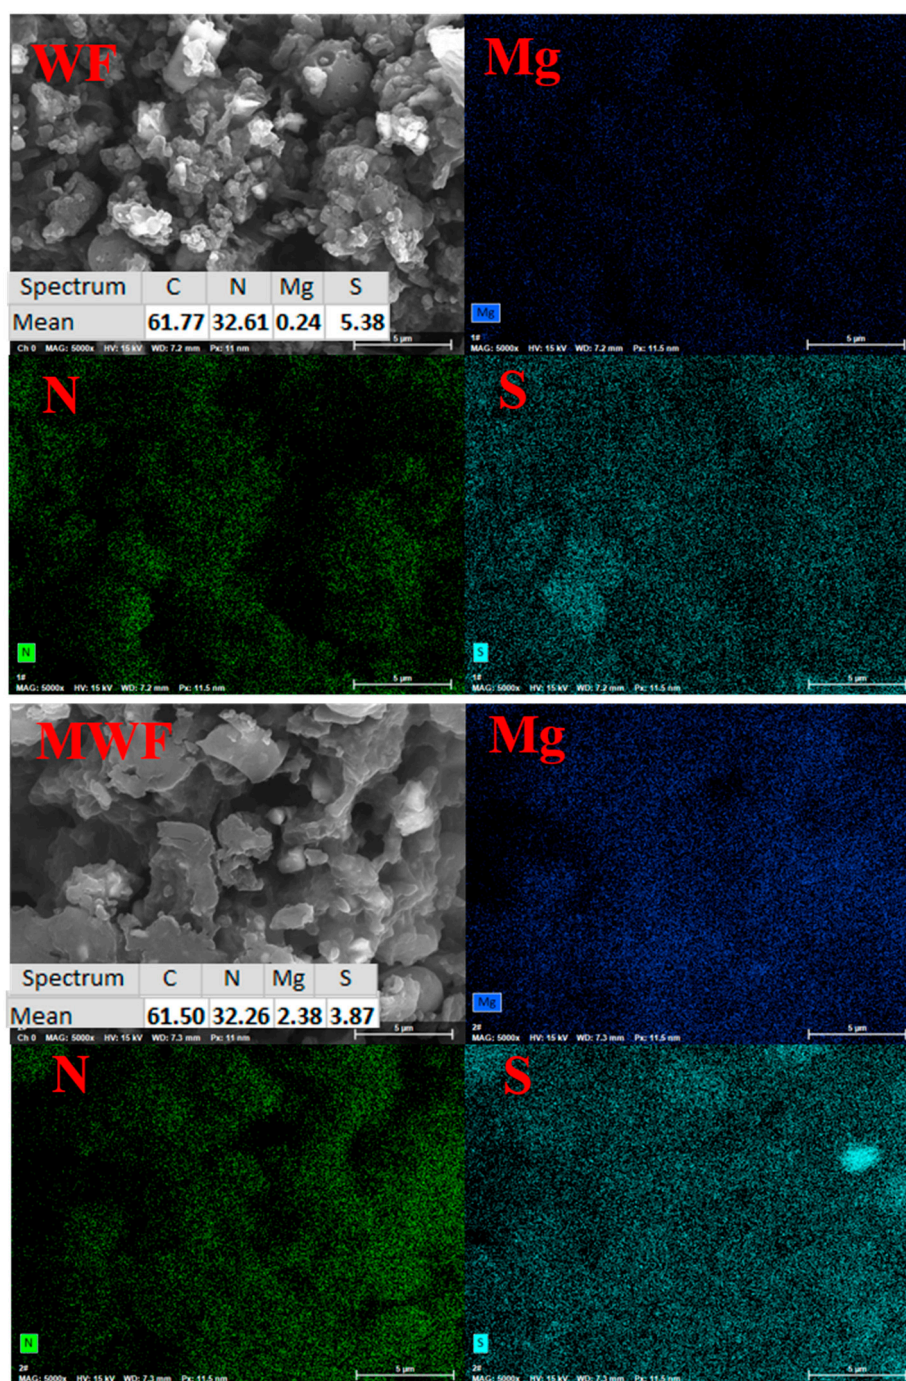

Figure S1. SEM-EDS images of hydrochar WF and MWF



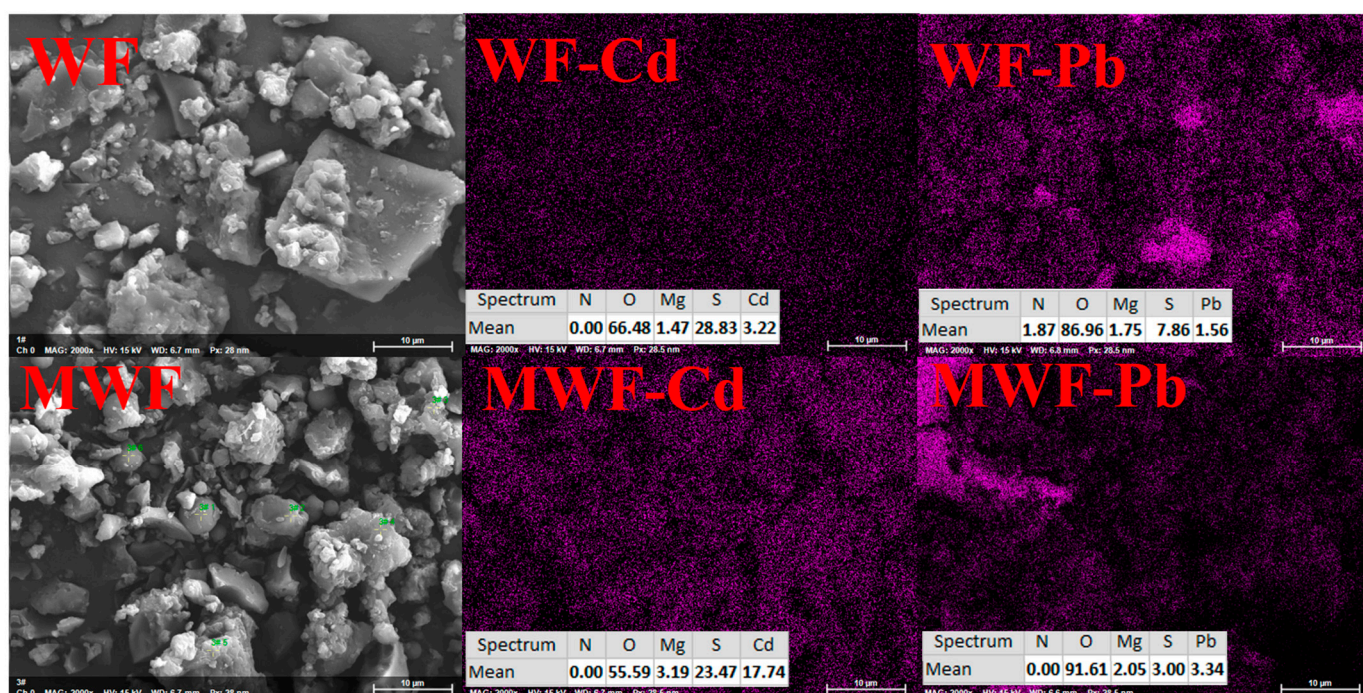

Figure S2. SEM-EDS images of  $\text{Cd}^{2+}$  and  $\text{Pb}^{2+}$  adsorbed by hydrochar WF and MWF

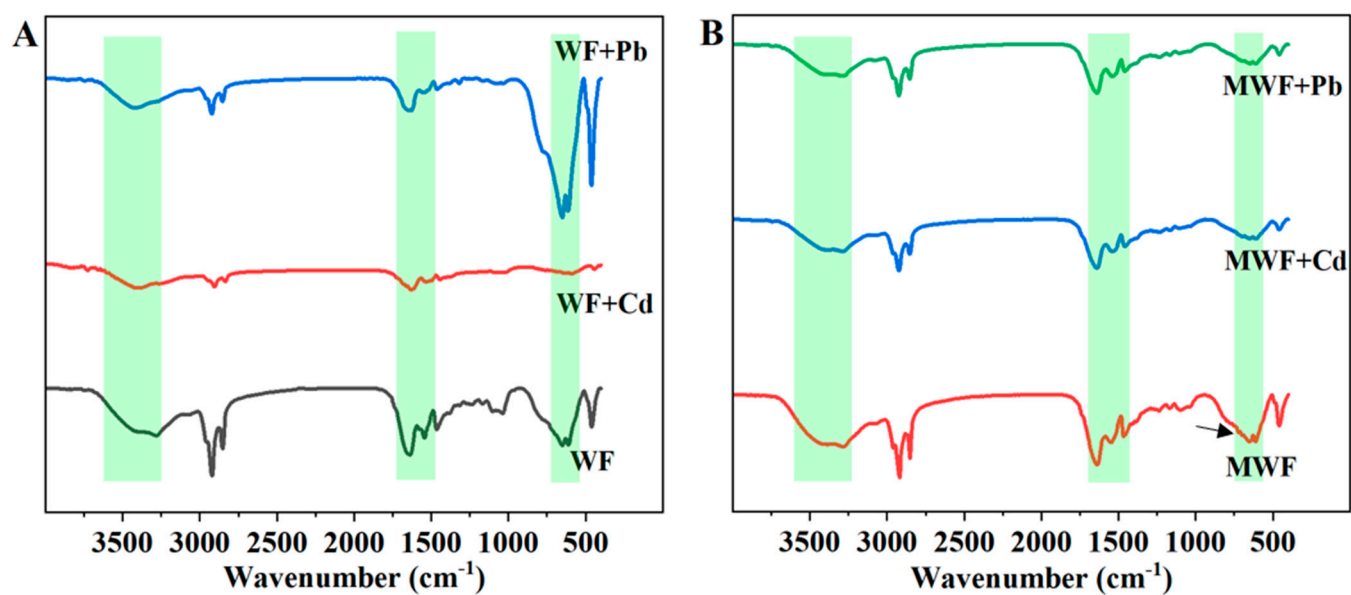

Figure S3. FTIR spectra before and after adsorption of  $\text{Cd}^{2+}$  and  $\text{Pb}^{2+}$  by hydrochar WF (A) and MWF (B)

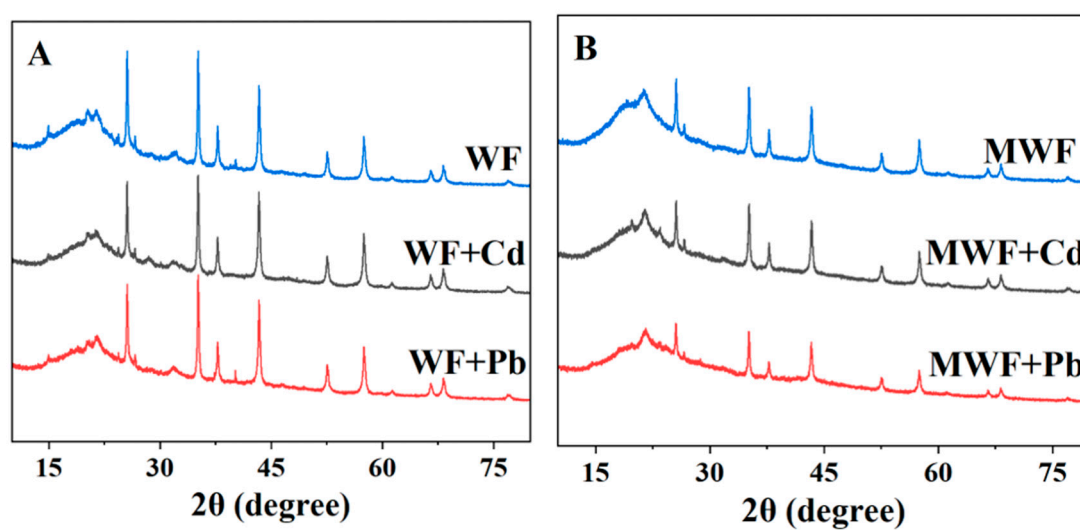

Figure S4. XRD patterns of hydrochar WF (A) and MWF (B) before and after adsorption of  $\text{Cd}^{2+}$  and  $\text{Pb}^{2+}$

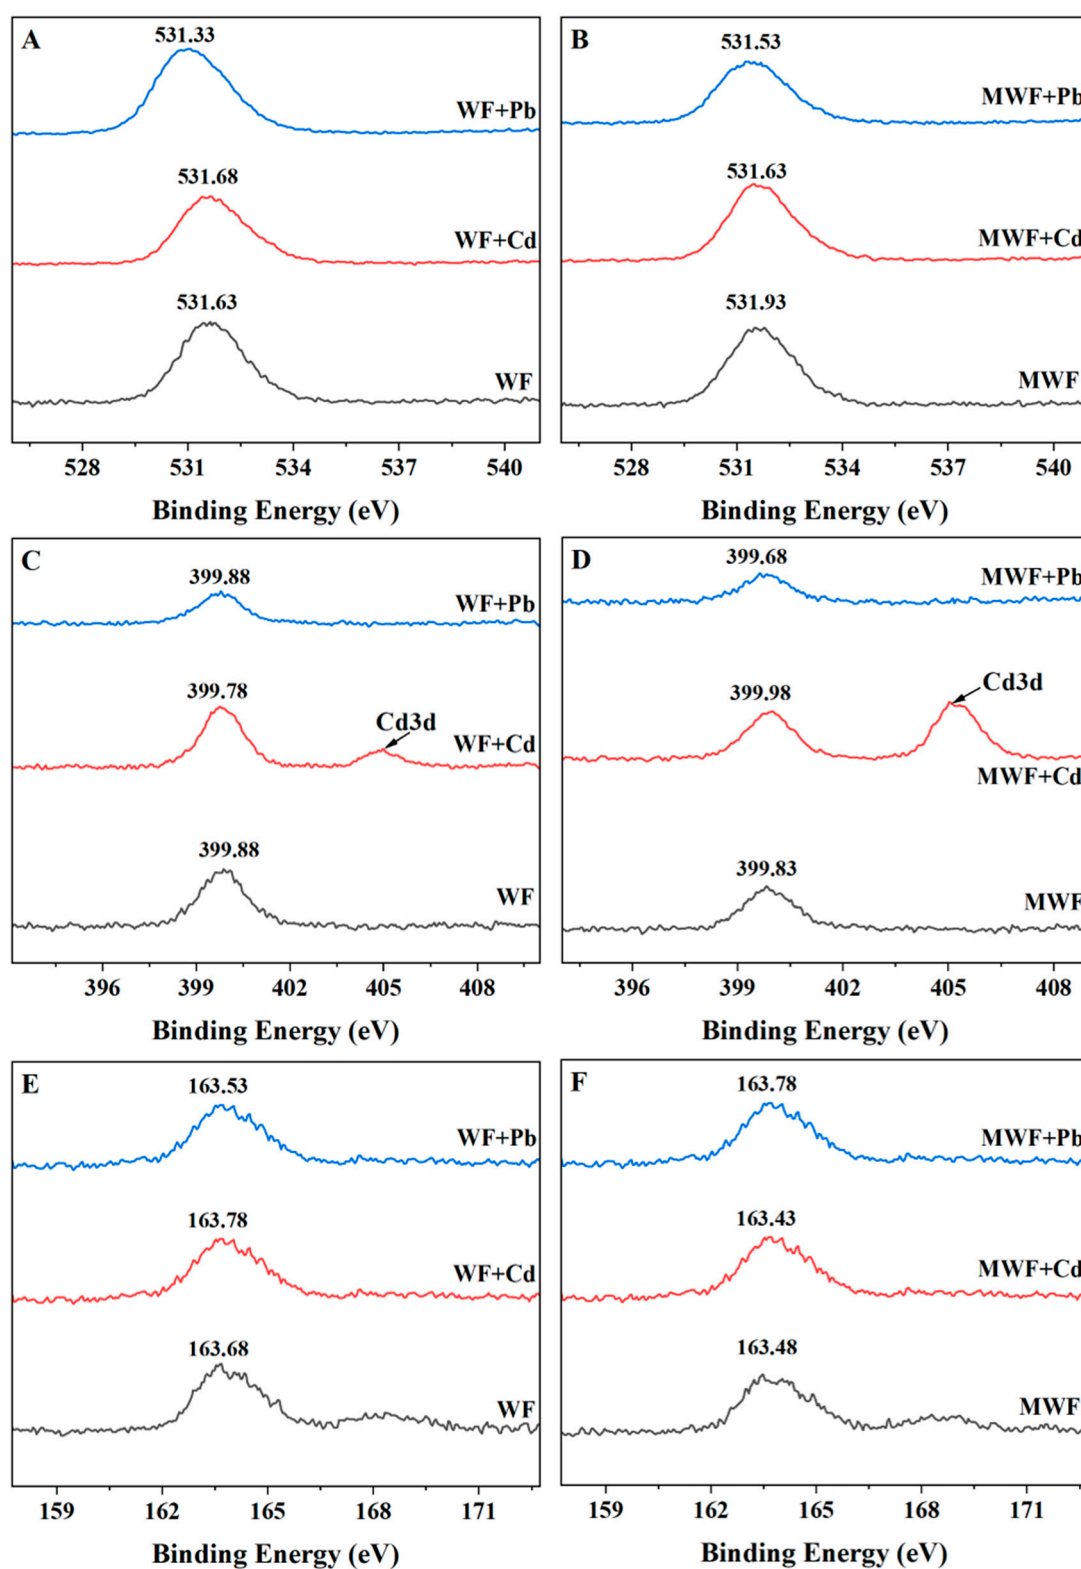

Figure S5. The XPS spectra of O1s (A, B), N1s (C, D) and S2p (E, F) of hydrochar WF and MWF before and after adsorption of  $\text{Cd}^{2+}$  and  $\text{Pb}^{2+}$

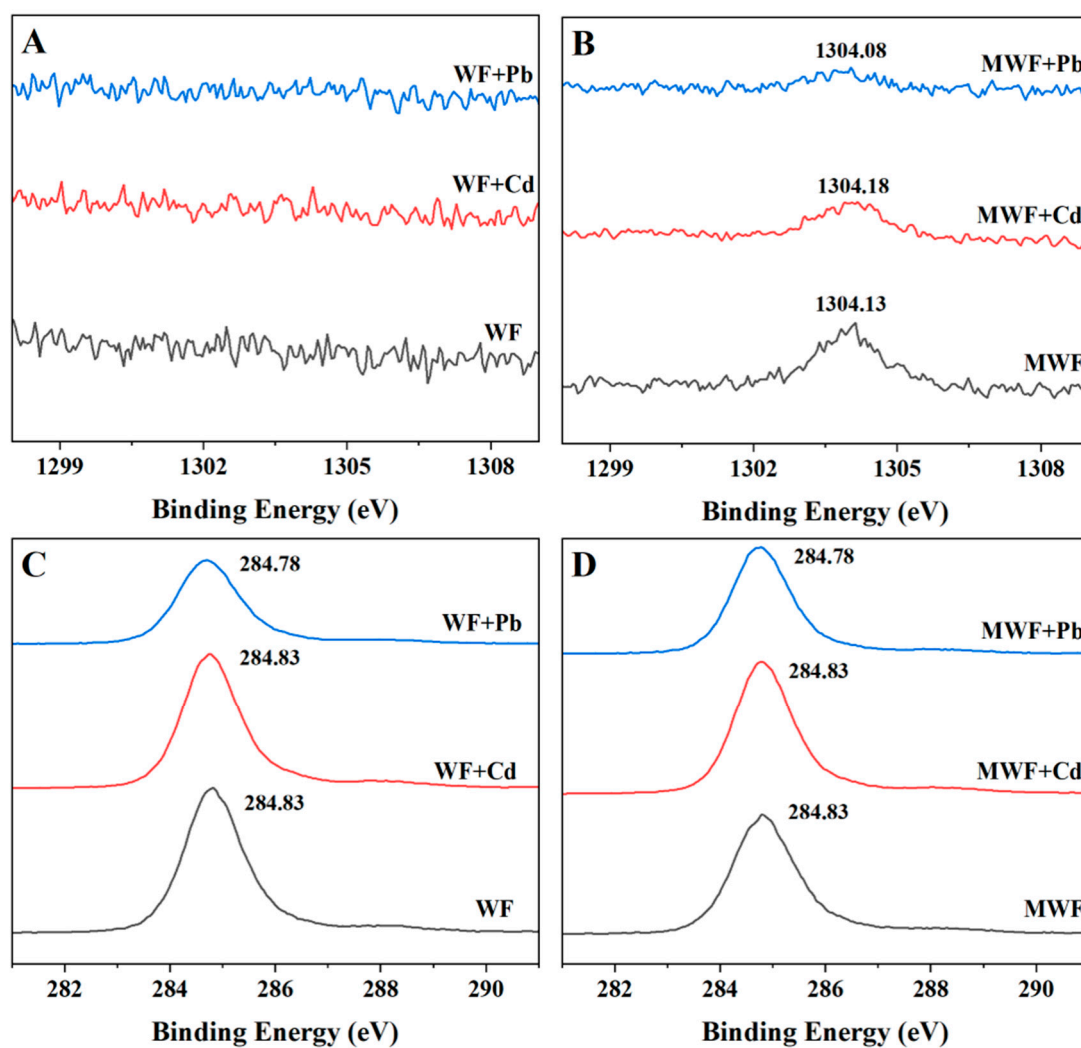

Figure S6. The XPS spectra of Mg1s (A, B) and C1s (C, D) of hydrochar WF and MWF before and after adsorption of  $\text{Cd}^{2+}$  and  $\text{Pb}^{2+}$



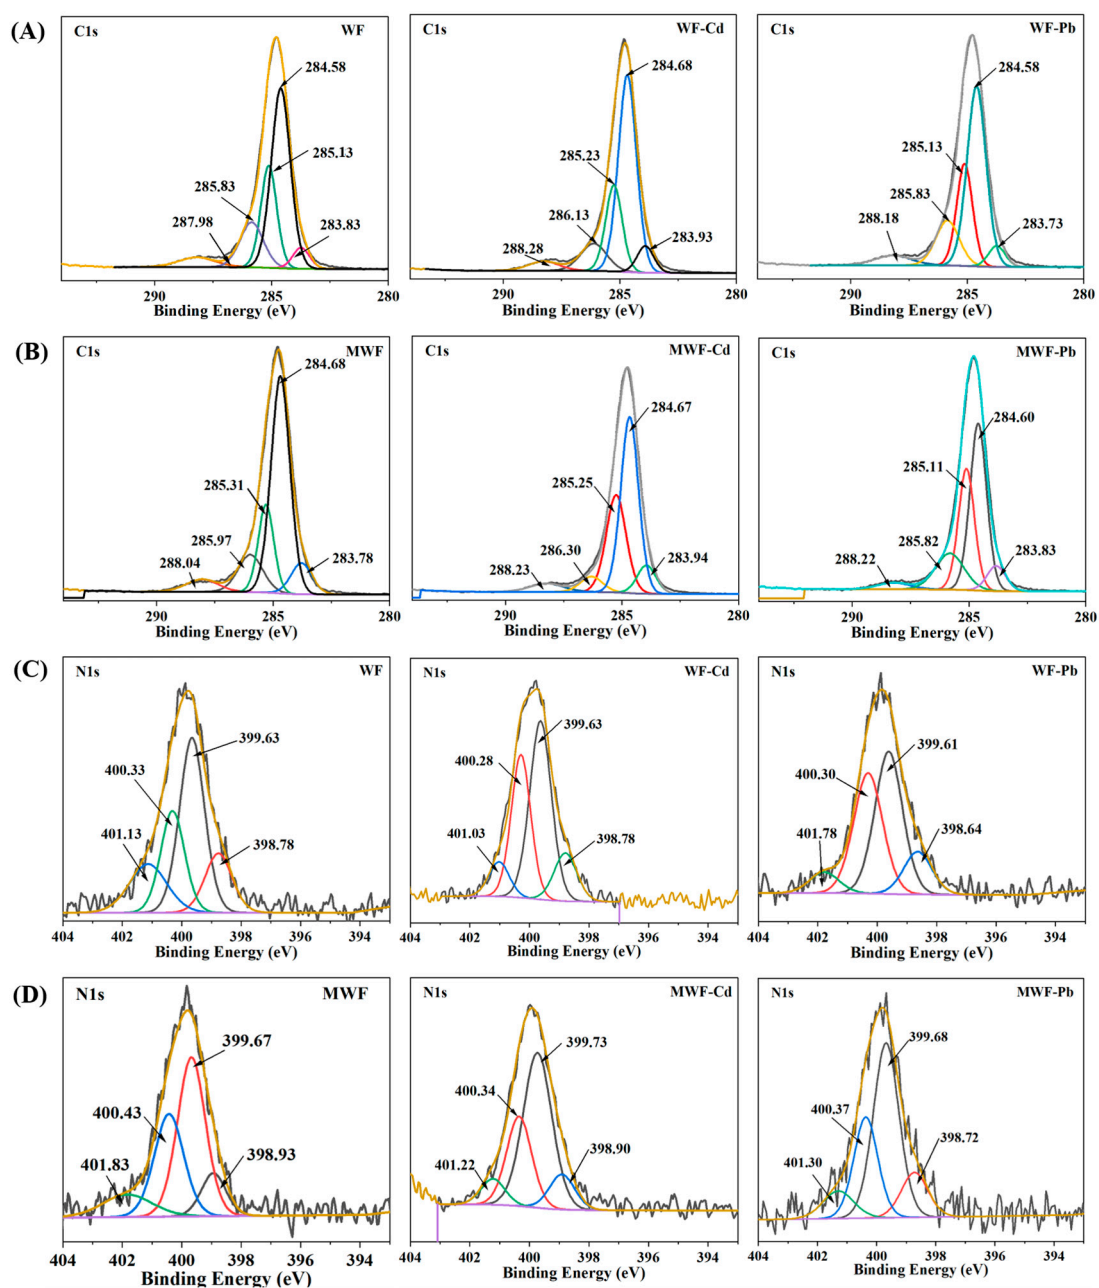

Figure S7. The C1s (A, B) and N1s (C, D) high-resolution XPS spectra of hydrochar WF (A, C) and MWF (B,D) before and after adsorption of  $\text{Cd}^{2+}$  and  $\text{Pb}^{2+}$

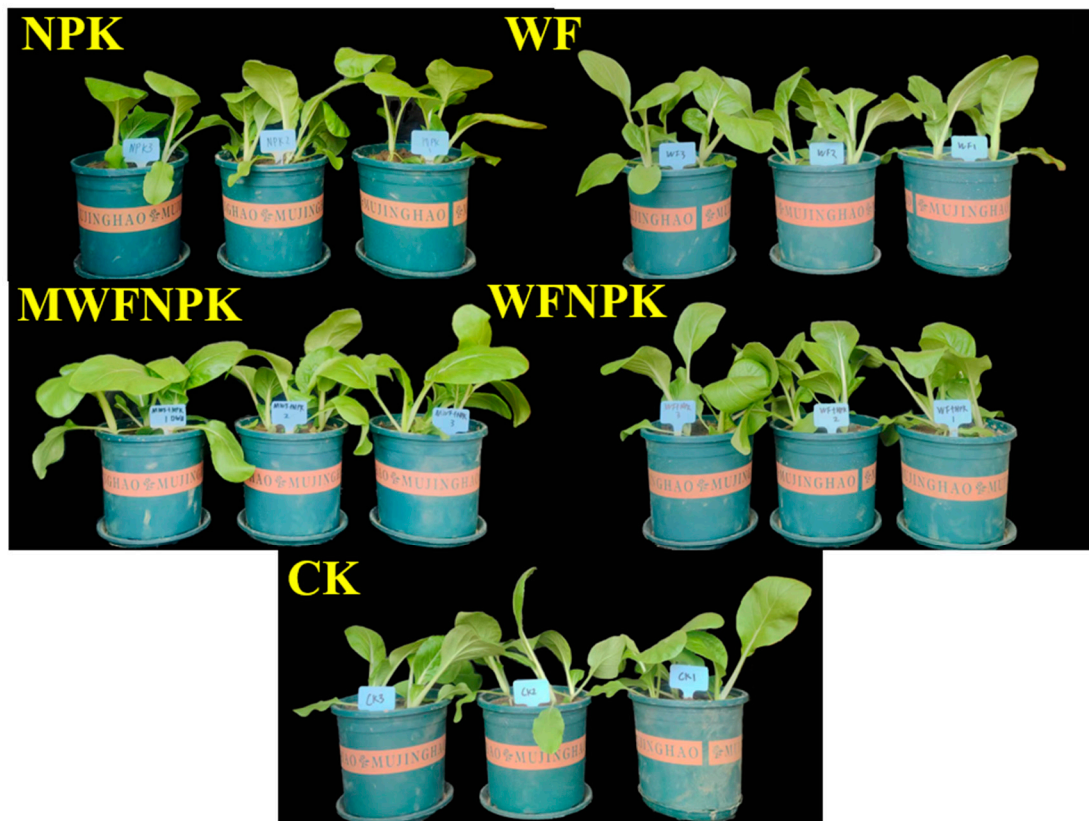

Figure S8. Growth of bok choy under different fertilization treatments
